# Supplementary material for: Immune cell infiltration and the genes associated with ligamentum flavum hypertrophy: Identification and validation
Source: Front Cell Dev Biol. 2022 Aug 10;10:914781. doi: 10.3389/fcell.2022.914781 (PMC9400804; doi:10.3389/fcell.2022.914781)
Supplement: Supplementary file 1 [file Table1.xls]

## Sheet: Sheet1
	ACSM5	COL4A3	PIGC	HSPA6	MACC1
control	1.12818	0.559419	1.24833	0.719966	2.14106
control	1.22603	0.591316	0.329877	0.618138	1.37394
control	1.499	0.209062	1.67018	1.1065	1.46623
control	0.487678	0.56331	1.15669	1.43993	1.21251
control	0.988971	0.507683	1.25701	1.4103	0.611415
control	0.514948	0.296109	1.81315	0.590292	0.274845
control	1.0479	0.453508	0.420011	0.414516	1.03389
control	1.24186	0.44356	0.174766	0.554592	1.22068
control	0.753929	0.330839	0.479134	0.207258	1.7718
control	1.13485	0.33314	0.334134	0.295146	1.12672
Hypertrophy	2.72074	2.16475	5.24157	1.67714	0.845761
Hypertrophy	1.62902	3.01927	4.95883	1.74836	0.63654
Hypertrophy	2.0195	2.77829	3.68075	2.18253	0.649915
Hypertrophy	2.43513	3.9504	1.94531	2.78176	0.756977
Hypertrophy	2.07628	3.39168	2.2974	2.40494	0.964814
Hypertrophy	0.638386	1.44593	3.24563	2.98866	1.14736
Hypertrophy	1.12701	1.21588	2.86493	2.24934	0.649915
Hypertrophy	1.67307	2.14652	3.36009	2.59278	1.71514
Hypertrophy	1.26795	2.77829	2.11184	2.41078	0.834117
Hypertrophy	1.14274	3.01927	0.711285	2.86692	1.65671
