# Supplementary material for: Immune cell infiltration and the genes associated with ligamentum flavum hypertrophy: Identification and validation
Source: Front Cell Dev Biol. 2022 Aug 10;10:914781. doi: 10.3389/fcell.2022.914781 (PMC9400804; doi:10.3389/fcell.2022.914781)
Supplement: Supplementary file 2 [file DataSheet1.xlsx]

## Sheet: 临床数据
sequencing of Genome-wide SNP and DNA methylation
HLF(n=5)				non-HLF(n=5)
Age/years	Gender	LF Thickness/cm		Age/years	Gender	LF Thickness/cm
87	Female	0.57		55	Female	0.33
70	Female	0.55		42	Male	0.28
86	Female	0.54		53	Female	0.28
57	Male	0.52		62	Female	0.27
75	Female	0.41		76	Male	0.26
verification of Genome-wide SNP and DNA methylation
HLF(n=10)				non-HLF(n=10)
Age/years	Gender	LF Thickness/cm		Age/years	Gender	LF Thickness/cm
87	Female	0.57		55	Female	0.33
70	Female	0.55		42	Male	0.28
86	Female	0.54		53	Female	0.28
57	Male	0.52		62	Female	0.27
75	Female	0.41		76	Male	0.26
63	Female	0.56		41	Male	0.37
75	Female	0.51		82	Male	0.35
60	Female	0.53		51	Male	0.36
62	Male	0.53		27	Male	0.28
56	Female	0.45		33	Female	0.3
